# Supplementary material for: Swiss Early Instrumental Meteorological Measurements
Source: Copernicus journal article supplement (doi:10.5194/cp-2019-26), 2019-03-14
Supplement: Supplementary file [file cp-2019-26-AC2-supplement.pdf]

## **Reply to the reviewers comments**

The impression of the reviewed paper is highly positive. We live and act in the era of "Big Data" (Dig - means big volume, velocity, variety - the three V's!). However the reviewed paper : Swiss Early Instrumental Meteorological Measurements - gives us an excellent example that just in the era of Big Data each part of "Small Data" (just a separate digit!!) is of high value and provides our understanding of processes in the past. The paper of Swiss colleagues from Bern demonstrates how accurate and cautious we should be with the content of old weather archives.

[We'd like to thank the reviewer for this very positive feedback and appreciate the recognition of the important role early instrumental measurements play in historical climatology.](#)
